# Supplementary material for: Breaking scaling relations and boosting ammonia synthesis in nitrogen reduction with V-containing heteronuclear double metal atoms
Source: Royal Society of Chemistry journal article supplement (doi:10.1039/d4ta06358a), 2024-12-03
Supplement: d4ta06358a1.pdf [file d4ta06358a1.pdf]

## **Breaking Scaling Relations and Boosting Ammonia Synthesis in Nitrogen Reduction with V-Containing Heteronuclear Double Metal Atoms**

Bingling He<sup>1,2</sup>, Mingyang Ren<sup>4</sup>, Liying Zhang<sup>2</sup>, Peng Lv<sup>5,6\*</sup>, Mengyin Liu<sup>1</sup>, Song Ye<sup>1</sup> and Yu  
Jia<sup>2,3\*</sup>

*<sup>1</sup>School of Electronic Engineering, Chaohu University, Hefei 238000, China*

*<sup>2</sup>Key Laboratory for Special Functional Materials of Ministry of Education, and School of  
Materials Science and Engineering, Henan University, Kaifeng, 475001, China*

*<sup>3</sup>International Laboratory for Quantum Functional Materials of Henan, and School of Physics  
and Engineering, Zhengzhou University, Zhengzhou 450001, China*

*<sup>4</sup>College of Physics and Electronic Information Engineering, Guilin University of Technology,  
Guilin, 541004, China*

*<sup>5</sup>Key Laboratory for High Efficiency Energy Conversion Science and Technology of Henan  
Province, International Joint Research Laboratory of New Energy Materials and Devices of  
Henan Province, School of Physics and Electronics, Henan University, Kaifeng, 475004, P. R.  
China*

*<sup>6</sup>Guangdong Provincial Key Laboratory of Electronic Functional Materials and Devices, Huizhou  
University, Huizhou 516001, China*

## **Supporting Information**

---

\* Corresponding author. E-mail: [lypeng@henu.edu.cn](mailto:lypeng@henu.edu.cn) (Peng Lv)

\* Corresponding author. E-mail: [jiayu@henu.edu.cn](mailto:jiayu@henu.edu.cn) (Yu Jia)

**Note S1** Calculations of formation energy ( $E_f$ ) and the dissolution potential ( $U_{\text{diss}}$ ) for V-TM@GDY.

The thermodynamic stability and electrochemical stability were evaluated by the formation energy ( $E_f$ ) and the dissolution potential ( $U_{\text{diss}}$ ), defined as:<sup>1</sup>

$$E_f = E(\text{total}) - E(\text{GDY}) - E(\text{V-bulk}) - E(\text{TM-bulk})$$

$$U_{\text{diss}} = U^0 - E_f/ne$$

Where  $E(\text{total})$  and  $E(\text{GDY})$  are the total energies of GDY with and without the V-TM pairs, respectively, and  $E(\text{V-bulk})$  and  $E(\text{TM-bulk})$  are the energies of the V and TM atoms in their bulk, respectively.  $U^0$  denotes the standard dissolution potential of bulk TM, and  $n$  is the number of electrons involved in the dissolution. The values of  $U^0$  and  $n$  comes from the previous literature.<sup>1</sup>

**Note S2** Calculations of binding energy ( $E_b$ ) between the V-TM pairs and GDY

The binding energy ( $E_b$ ) was calculated to estimate the binding ability, which is defined as:

$$E_b = E(\text{total}) - E(\text{GDY}) - E(\text{V-atom}) - E(\text{TM-atom})$$

Here,  $E(\text{total})$  and  $E(\text{GDY})$  represent the total energies of the GDY monolayer with and without the anchored atoms, respectively.  $E(\text{V-atom})$  and  $E(\text{TM-atom})$  are the energies of the V and TM atoms in vacuum, respectively. The more negative  $E_b$  represents a larger binding strength.

**Note S3** Calculations of the adsorption free energy for the adsorbates.

The adsorption free energy,  $\Delta G(X)$ , was calculated using the equation:

$$\Delta G(X) = G(\text{sub}+X) - G(\text{sub}) - G(X)$$

where  $G(\text{sub}+X)$  and  $G(\text{sub})$  are the free energies of the systems with and without the adsorbate, respectively, and  $G(X)$  is the free energy of the X molecule in vacuum.

**Note S4** Calculations of theoretical Faradaic efficiency (FE)

HER is a major competing reaction to NRR. The catalytic selectivity based on theoretical FE can be estimated using the Boltzmann distribution<sup>2</sup> and is calculated using the following formula:<sup>3-4</sup>

$$\text{FE} = \frac{1}{1 + e^{-\frac{\delta G}{k_B T}}} \times 100\%$$

where  $\delta G$  represents the difference in Gibbs free energy change of the PDS between HER and NRR,  $k_B$  is the Boltzmann constant, and  $T = 298.15$  K. This formula is based on two assumptions: (1) only HER and NRR are considered as competing side reactions, and (2) proton and electron transfer are not the rate-determining steps for either HER or NRR.

**Table S1** Zero-point energy corrections ( $\Delta E_{\text{ZPE}}$ , eV), and entropic contributions (at 298.15 K) to the free energies ( $T\Delta S$ , eV). The values for the free molecules were obtained from Ref. 5.

| Species                            | $\Delta E_{\text{ZPE}}$ (eV) | $T\Delta S$ (eV) |
|------------------------------------|------------------------------|------------------|
| N <sub>2</sub>                     | 0.15                         | 0.58             |
| *N-*N                              | 0.21                         | 0.09             |
| *N-*NH                             | 0.52                         | 0.09             |
| *N-*NH <sub>2</sub>                | 0.86                         | 0.11             |
| *NH-*NH                            | 0.81                         | 0.12             |
| *NH-*NH <sub>2</sub>               | 1.15                         | 0.15             |
| *NH <sub>2</sub> -*NH <sub>2</sub> | 1.51                         | 0.16             |
| *N                                 | 0.09                         | 0.04             |
| *NH                                | 0.36                         | 0.07             |
| *NH <sub>2</sub>                   | 0.69                         | 0.08             |
| *NH <sub>3</sub>                   | 1.03                         | 0.15             |
| NH <sub>3</sub>                    | 0.89                         | 0.60             |
| H <sub>2</sub> O                   | 0.56                         | 0.67             |
| *H <sub>2</sub> O                  | 0.66                         | 0.14             |
| *H                                 | 0.16                         | 0.02             |

**Table S2** Binding energy ( $E_b$ , eV), formation energy ( $E_f$ , eV), dissolution potential ( $U_{\text{diss}}$ , V), bond length between V and the TM ( $d_{\text{V-TM}}$ , Å), number of transferred electrons to V ( $Q_V$ , e) and TM ( $Q_{\text{TM}}$ , e) for V-TM@GDY, and d band center of V ( $\epsilon_d(\text{V})$ , eV) and TM ( $\epsilon_d(\text{TM})$ , eV) atoms.

| System | $E_b$ | $E_f$ | $U_{\text{diss}}$ | $d_{\text{V-TM}}$ | $Q_V$ | $Q_{\text{TM}}$ | $\epsilon_d(\text{V})$ | $\epsilon_d(\text{TM})$ |
|--------|-------|-------|-------------------|-------------------|-------|-----------------|------------------------|-------------------------|
| V-Sc   | -8.98 | 1.62  | -1.95             | 2.68              | -0.89 | -1.39           | -0.01                  | 0.47                    |
| V-Ti   | -9.11 | 2.90  | -2.13             | 2.70              | -0.90 | -1.17           | -0.01                  | -0.02                   |
| V-V    | -7.99 | 3.78  | -2.12             | 2.64              | -0.95 | -0.95           | -0.21                  | -0.22                   |
| V-Cr   | -6.62 | 3.68  | -1.96             | 2.57              | -0.96 | -0.83           | -0.24                  | -0.20                   |
| V-Mn   | -6.78 | 3.14  | -1.97             | 2.59              | -0.97 | -0.68           | -0.26                  | -0.86                   |
| V-Fe   | -8.09 | 3.22  | -1.62             | 2.35              | -0.99 | -0.45           | -0.30                  | -1.42                   |
| V-Co   | -8.45 | 3.08  | -1.50             | 2.34              | -1.02 | -0.25           | -0.23                  | -1.32                   |
| V-Ni   | -8.12 | 2.94  | -1.45             | 2.41              | -1.00 | -0.23           | -0.20                  | -1.98                   |
| V-Cu   | -3.84 | 3.86  | -1.39             | 2.60              | -0.97 | -0.30           | 0.02                   | -3.33                   |

**Table S3** N<sub>2</sub> adsorption free energy ( $\Delta G(N_2)$ , eV), N-N bond length ( $d_{N-N}$ , Å), number of transferred electrons to N<sub>2</sub> ( $\Delta Q(N_2)$ , e), N-N ICOHP for the adsorbed N<sub>2</sub> molecules (ICOHP(N<sub>2</sub>)), potential-determining step (PDS), and limiting potential ( $U_L(NH_3)$ , in V) for NRR on V-TM@GDY.

| System    | $\Delta G(N_2)$ | $d_{N-N}$ | $\Delta Q(N_2)$ | ICOHP(N <sub>2</sub> ) | PDS                                   | $U_L(NH_3)$ |
|-----------|-----------------|-----------|-----------------|------------------------|---------------------------------------|-------------|
| V-Sc-side | -0.88           | 1.20      | 0.77            | -9.27                  | $*NH_2 + H^+ + e^- \rightarrow *NH_3$ | -0.99       |
| V-Ti-side | -1.32           | 1.21      | 0.76            | -9.01                  | $*NH_2 + H^+ + e^- \rightarrow *NH_3$ | -0.87       |
| V-V-side  | -1.34           | 1.23      | 0.85            | -8.46                  | $*NH_2 + H^+ + e^- \rightarrow *NH_3$ | -0.74       |
| V-Cr-side | -1.00           | 1.21      | 0.74            | -9.18                  | $*NH_2 + H^+ + e^- \rightarrow *NH_3$ | -0.36       |
| V-Mn-side | -0.62           | 1.18      | 0.61            | -9.81                  | $*NH_2 + H^+ + e^- \rightarrow *NH_3$ | -0.41       |
| V-Fe-side | -0.69           | 1.19      | 0.59            | -9.73                  | $*NH_2 + H^+ + e^- \rightarrow *NH_3$ | -0.42       |
| V-Co-side | -0.63           | 1.18      | 0.59            | -9.70                  | $*NH_2 + H^+ + e^- \rightarrow *NH_3$ | -0.63       |
| V-Ni-side | -0.36           | 1.17      | 0.52            | -10.02                 | $*NH_2 + H^+ + e^- \rightarrow *NH_3$ | -0.71       |
| V-Cu-side | -0.40           | 1.19      | 0.62            | -9.52                  | $*NH_2 + H^+ + e^- \rightarrow *NH_3$ | -0.42       |
| V-Cr-end  | -0.16           | 1.13      | 0.25            | -11.09                 | /                                     | /           |
| V-Mn-end  | -0.26           | 1.14      | 0.36            | -10.71                 | /                                     | /           |
| V-Fe-end  | -0.66           | 1.14      | 0.37            | -10.63                 | $*NN + H^+ + e^- \rightarrow *NNH$    | -0.50       |
| V-Co-end  | -0.67           | 1.14      | 0.35            | -10.62                 | $*NH_2 + H^+ + e^- \rightarrow *NH_3$ | -0.63       |
| V-Ni-end  | -0.41           | 1.15      | 0.38            | -10.35                 | $*NH_2 + H^+ + e^- \rightarrow *NH_3$ | -0.71       |
| V-Cu-end  | -0.59           | 1.14      | 0.26            | -10.98                 | $*NN + H^+ + e^- \rightarrow *NNH$    | -0.53       |



**Table S4** Adsorption free energy of  $\text{NH}_2$  ( $\Delta\text{G}(\text{NH}_2)$ , eV),  $\text{NH}_3$  ( $\Delta\text{G}(\text{NH}_3)$ , eV), H ( $\Delta\text{G}(\text{H})$ , eV), and  $\text{H}_2\text{O}$  ( $\Delta\text{G}(\text{H}_2\text{O})$ , eV), desorption energy of  $\text{NH}_3$  ( $\Delta\text{G}_{\text{des}}(\text{NH}_3)$ , eV), and Faradaic efficiency (FE) of NRR.

| System | $\Delta\text{G}(\text{NH}_2)$ | $\Delta\text{G}(\text{NH}_3)$ | $\Delta\text{G}_{\text{des}}(\text{NH}_3)$ | $\Delta\text{G}(\text{H})$ | FE     | $\Delta\text{G}(\text{H}_2\text{O})$ |
|--------|-------------------------------|-------------------------------|--------------------------------------------|----------------------------|--------|--------------------------------------|
| V-Sc   | -2.51                         | -1.52                         | 0.79                                       | -0.54                      | 0%     | -0.48                                |
| V-Ti   | -2.63                         | -1.76                         | 1.03                                       | -0.61                      | 0%     | -0.57                                |
| V-V    | -2.67                         | -1.93                         | 1.20                                       | -0.19                      | 0%     | -0.73                                |
| V-Cr   | -2.25                         | -1.88                         | 1.15                                       | -0.76                      | 100%   | -0.59                                |
| V-Mn   | -2.34                         | -1.93                         | 1.20                                       | -0.68                      | 100%   | -0.40                                |
| V-Fe   | -2.24                         | -1.82                         | 1.08                                       | -0.67                      | 99.99% | -0.60                                |
| V-Co   | -2.36                         | -1.73                         | 0.99                                       | -0.79                      | 99.81% | -0.68                                |
| V-Ni   | -2.46                         | -1.75                         | 1.02                                       | -0.86                      | 99.72% | -0.56                                |
| V-Cu   | -2.43                         | -2.01                         | 1.28                                       | -1.01                      | 100%   | -0.61                                |

**Table S5** Number of electrons transferred to V-Cr (Q(V-Cr), *e*), V-Fe (Q(V-Fe), *e*), N<sub>x</sub>H<sub>y</sub> (Q(N<sub>x</sub>H<sub>y</sub>), *e*), and GDY (Q(GDY), *e*) during the NRR processes on V-Cr@GDY and V-Fe@GDY, respectively.

| V-Cr                 | Q(V-Cr) | Q(N <sub>x</sub> H <sub>y</sub> ) | Q(GDY) | V-Fe                 | Q(V-Fe) | Q(N <sub>x</sub> H <sub>y</sub> ) | Q(GDY) |
|----------------------|---------|-----------------------------------|--------|----------------------|---------|-----------------------------------|--------|
| *+N <sub>2</sub>     | -1.79   | 0.00                              | 1.79   | *+N <sub>2</sub>     | -1.46   | 0.00                              | 1.46   |
| *N-*N                | -2.28   | 0.74                              | 1.55   | *N-*N                | -1.88   | 0.58                              | 1.29   |
| *N-*NH               | -2.36   | 0.77                              | 1.59   | *N-*NH               | -2.01   | 0.70                              | 1.31   |
| *NH-*NH              | -2.29   | 0.70                              | 1.59   | *NH-*NH              | -2.05   | 0.59                              | 1.46   |
| *NH-*NH <sub>2</sub> | -2.20   | 0.34                              | 1.86   | *NH-*NH <sub>2</sub> | -1.93   | 0.28                              | 1.65   |
| *NH                  | -2.32   | 0.78                              | 1.54   | *NH                  | -1.92   | 0.69                              | 1.23   |
| *NH <sub>2</sub>     | -2.17   | 0.42                              | 1.76   | *NH <sub>2</sub>     | -1.83   | 0.39                              | 1.45   |
| *NH <sub>3</sub>     | -1.97   | -0.15                             | 2.12   | *NH <sub>3</sub>     | -1.62   | -0.15                             | 1.77   |

**Table S6** The potential-determining step (PDS) and limiting potential ( $U_L(\text{NH}_3)$ , in V) for V-TM@GDY in our work, compared with those for TM@GDY from reference<sup>6</sup>.

| System | PDS                                                                 | $U_L(\text{NH}_3)$ | system | PDS                                                               | $U_L(\text{NH}_3)$ |
|--------|---------------------------------------------------------------------|--------------------|--------|-------------------------------------------------------------------|--------------------|
| V-Sc   | $^*\text{NH}_2 + \text{H}^+ + \text{e}^- \rightarrow ^*\text{NH}_3$ | -0.99              | Sc@GDY | $^*\text{N}_2 + \text{H}^+ + \text{e}^- \rightarrow ^*\text{NNH}$ | -1.41              |
| V-Ti   | $^*\text{NH}_2 + \text{H}^+ + \text{e}^- \rightarrow ^*\text{NH}_3$ | -0.87              | Ti@GDY | $^*\text{N}_2 + \text{H}^+ + \text{e}^- \rightarrow ^*\text{NNH}$ | -0.87              |
| V-V    | $^*\text{NH}_2 + \text{H}^+ + \text{e}^- \rightarrow ^*\text{NH}_3$ | -0.74              | V@GDY  | $^*\text{N}_2 + \text{H}^+ + \text{e}^- \rightarrow ^*\text{NNH}$ | -0.67              |
| V-Cr   | $^*\text{NH}_2 + \text{H}^+ + \text{e}^- \rightarrow ^*\text{NH}_3$ | -0.36              | Cr@GDY | ---                                                               | ---                |
| V-Mn   | $^*\text{NH}_2 + \text{H}^+ + \text{e}^- \rightarrow ^*\text{NH}_3$ | -0.41              | Mn@GDY | $^*\text{N}_2 + \text{H}^+ + \text{e}^- \rightarrow ^*\text{NNH}$ | -1.00              |
| V-Fe   | $^*\text{NH}_2 + \text{H}^+ + \text{e}^- \rightarrow ^*\text{NH}_3$ | -0.42              | Fe@GDY | $^*\text{N}_2 + \text{H}^+ + \text{e}^- \rightarrow ^*\text{NNH}$ | -0.74              |
| V-Co   | $^*\text{NH}_2 + \text{H}^+ + \text{e}^- \rightarrow ^*\text{NH}_3$ | -0.63              | Co@GDY | $^*\text{N}_2 + \text{H}^+ + \text{e}^- \rightarrow ^*\text{NNH}$ | -0.78              |
| V-Ni   | $^*\text{NH}_2 + \text{H}^+ + \text{e}^- \rightarrow ^*\text{NH}_3$ | -0.71              | Ni@GDY | $^*\text{N}_2 + \text{H}^+ + \text{e}^- \rightarrow ^*\text{NNH}$ | -1.75              |
| V-Cu   | $^*\text{NH}_2 + \text{H}^+ + \text{e}^- \rightarrow ^*\text{NH}_3$ | -0.42              | Cu@GDY | $^*\text{N}_2 + \text{H}^+ + \text{e}^- \rightarrow ^*\text{NNH}$ | -1.69              |

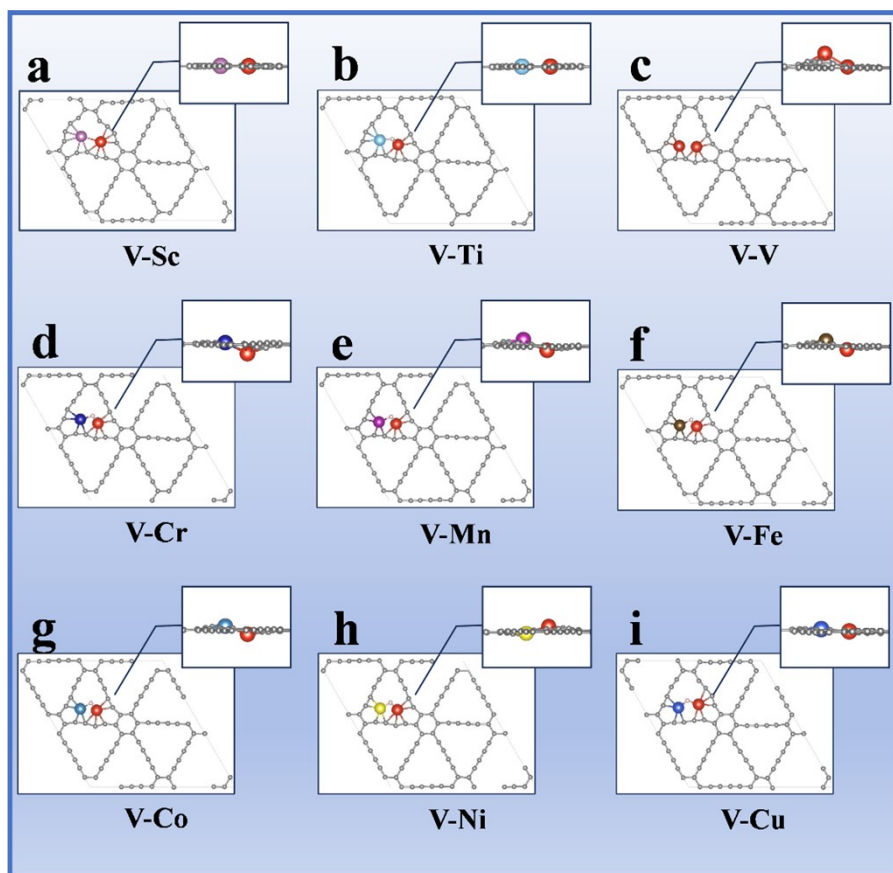

**Fig. S1** Optimized structures of V-Sc@GDY (a), V-Ti@GDY (b), V-V@GDY (c), V-Cr@GDY (d), V-Mn@GDY (e), V-Fe@GDY (f), V-Co@GDY (g), V-Ni@GDY (h), and V-Cu@GDY (i).

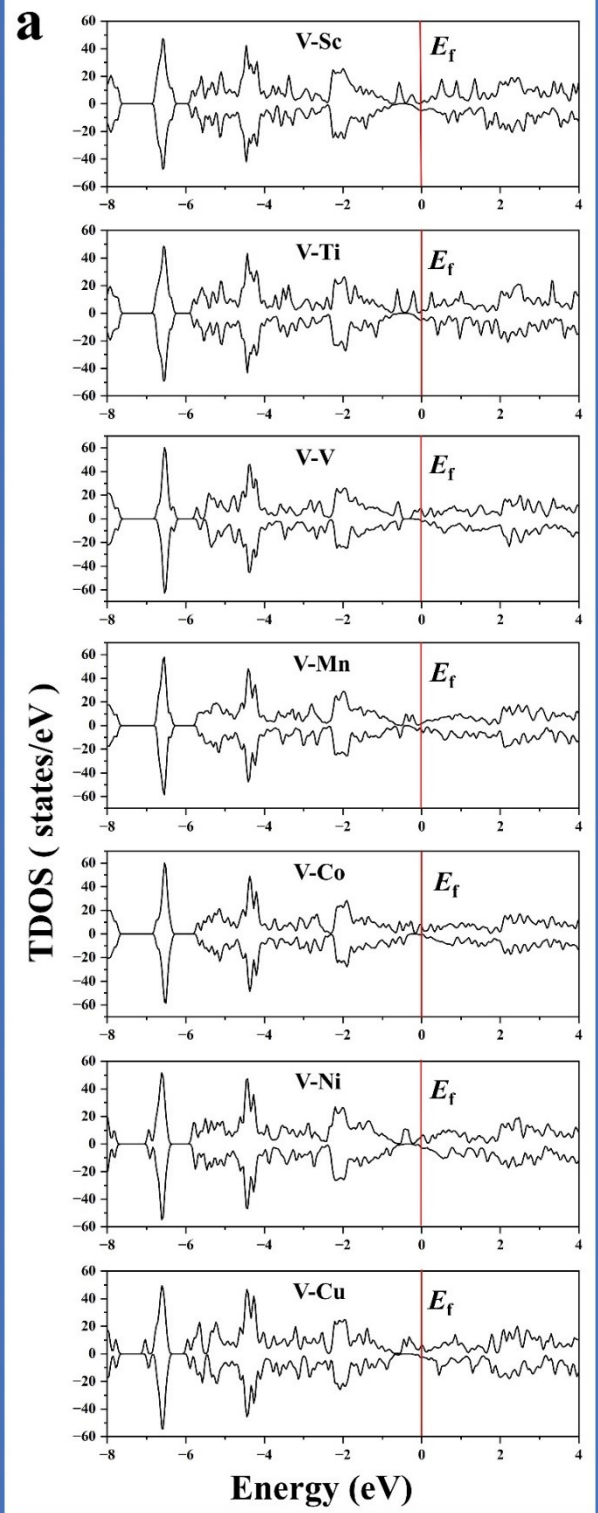

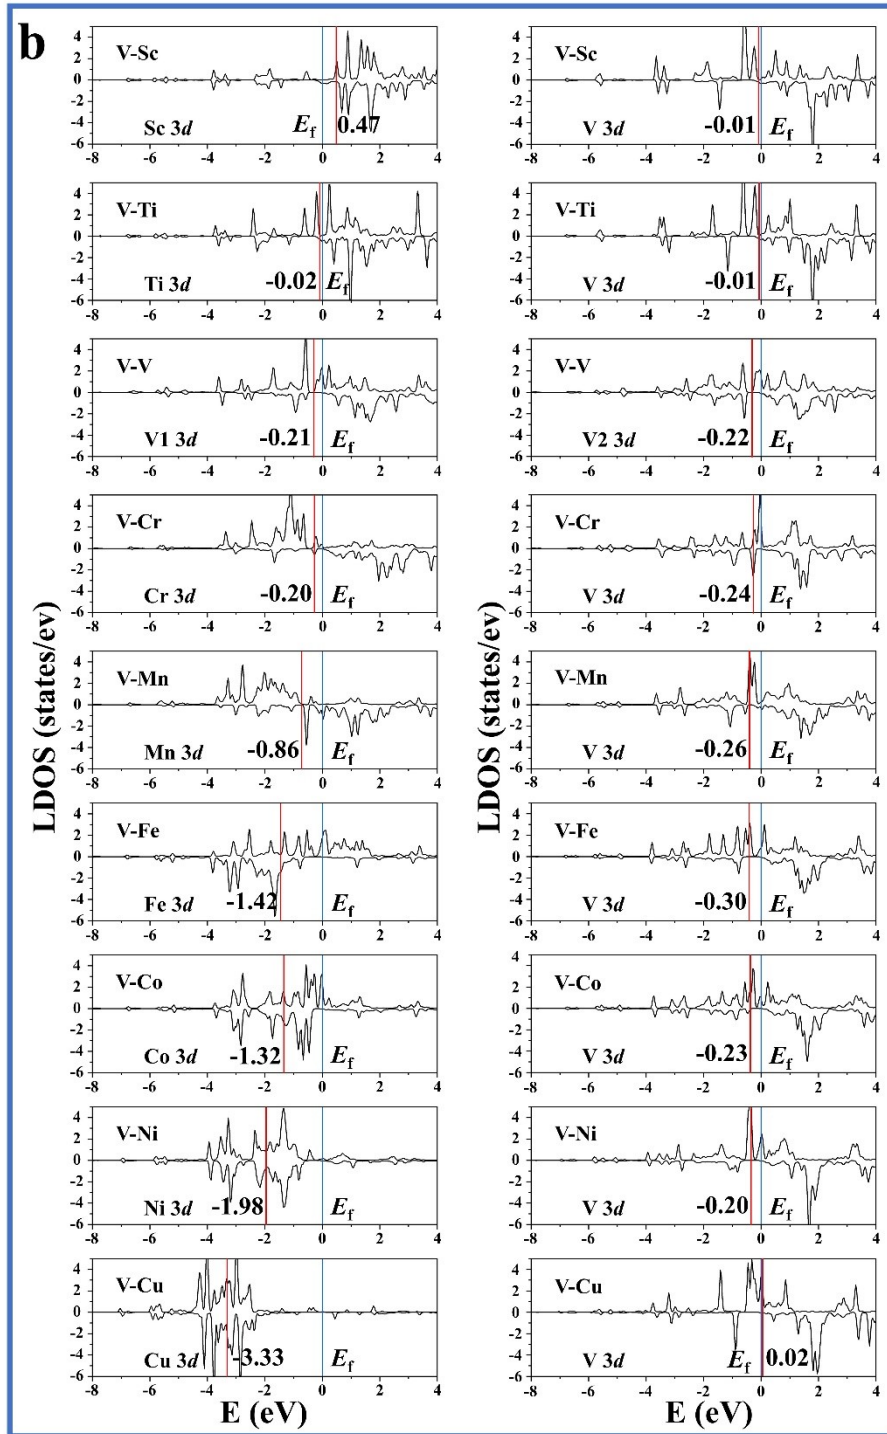

**Fig. S2** The TDOS (a) and LDOS (b) for the V-TM@GDY (TM = Sc ~ Cu).

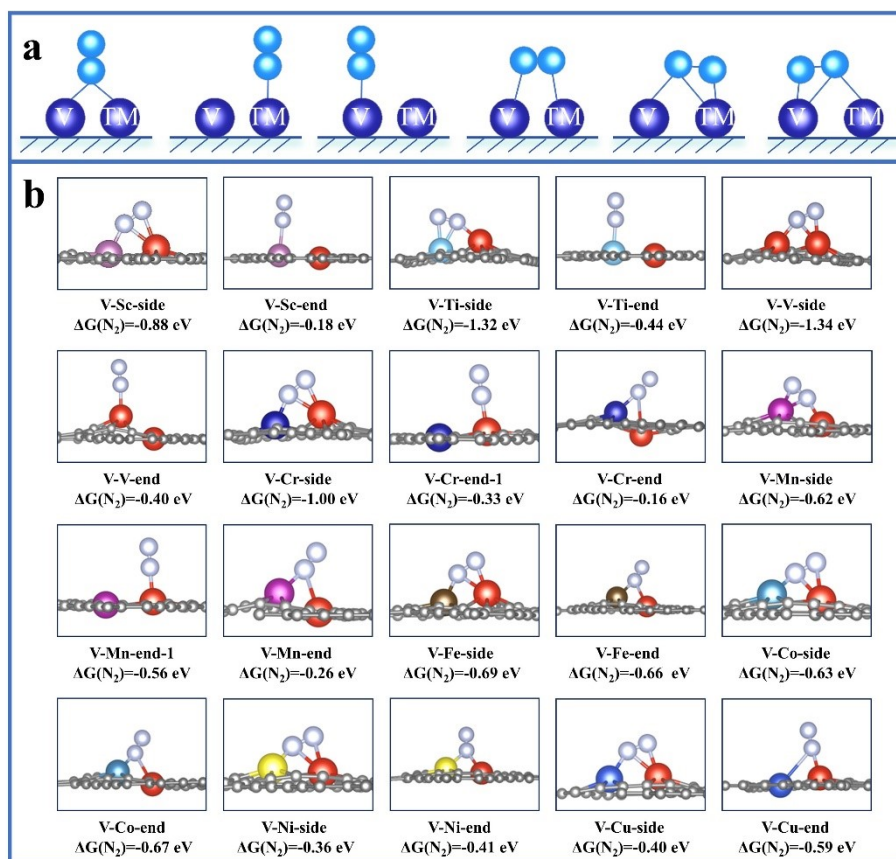

**Fig. S3** The considered  $N_2$  adsorption configuration (a), and most stable  $N_2$  side-on and end-on configurations on V-TM@GDY (Sc = Sc to V).

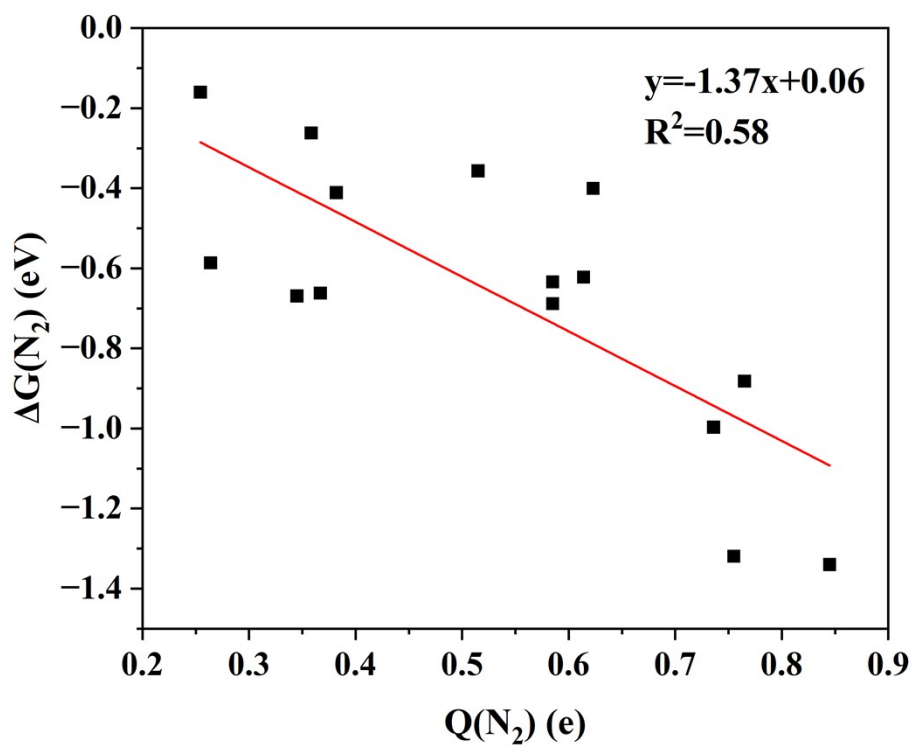

**Fig. S4** The N<sub>2</sub> adsorption free energy ( $\Delta G(N_2)$ ) versus the corresponding number of transferred electrons on N<sub>2</sub> ( $Q(N_2)$ ). A positive  $Q(N_2)$  value indicates that the N<sub>2</sub> molecules have gained electrons.



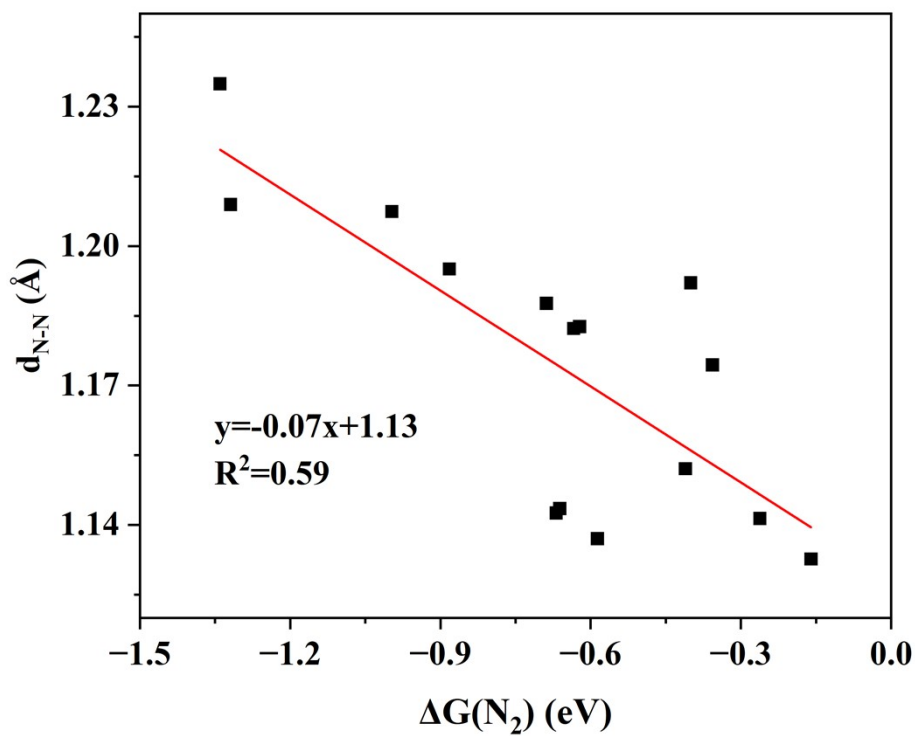

**Fig. S5** The N-N bond length ( $d_{N-N}$ ) versus the corresponding  $N_2$  adsorption free energy ( $\Delta G(N_2)$ ).

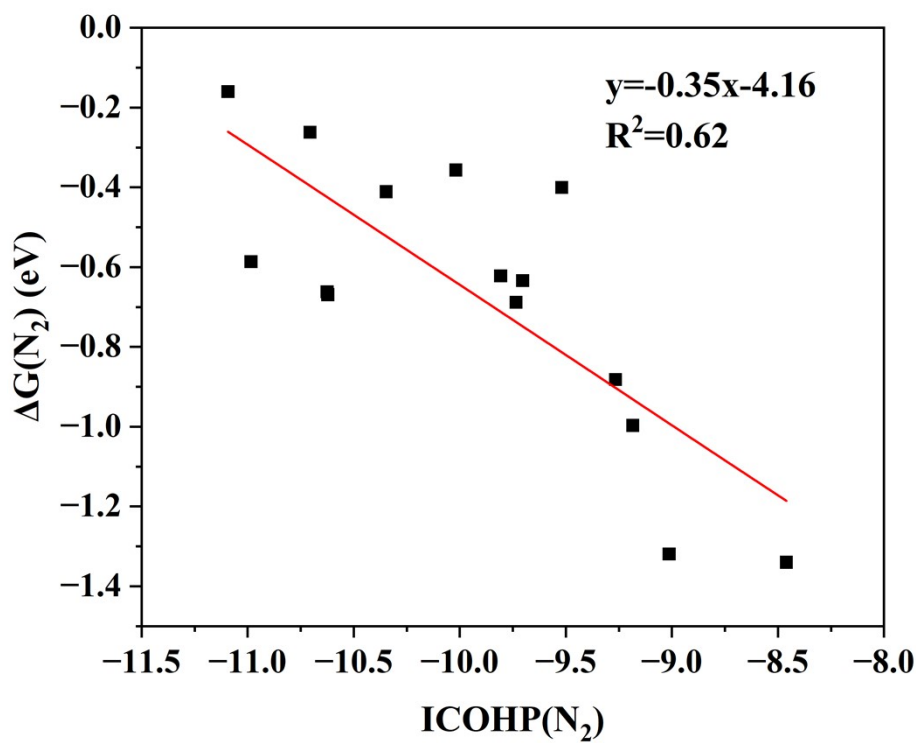

**Fig. S6** The N<sub>2</sub> adsorption free energy ( $\Delta G(N_2)$ ) versus the ICOHP of N-N bond ( $ICOHP(N_2)$ ).

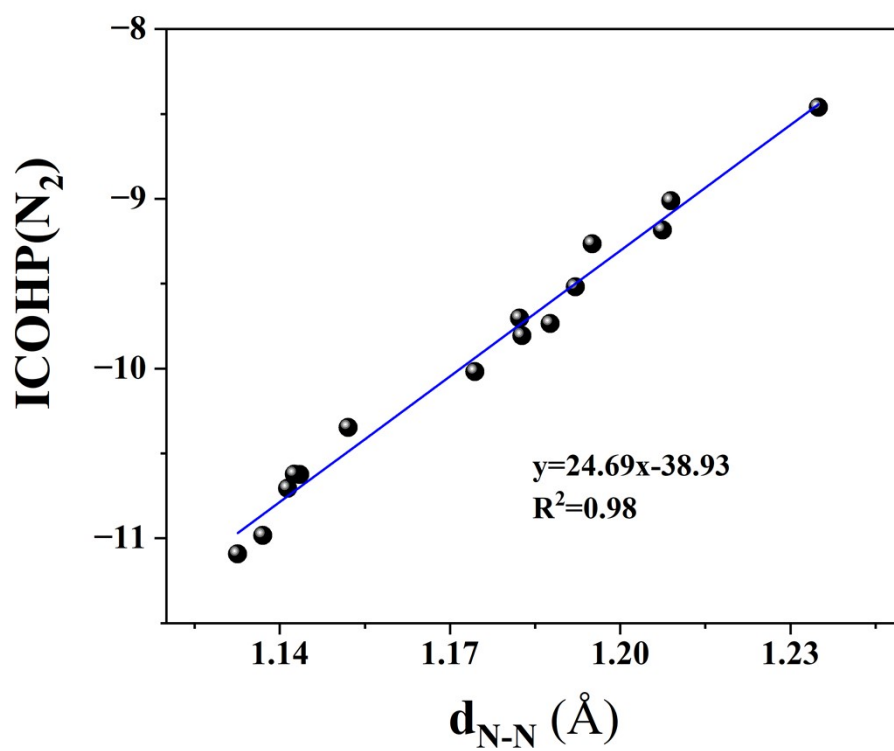

**Fig. S7** The ICOHP of N-N bond (ICOHP(N<sub>2</sub>)) versus the N-N bond length (d<sub>N-N</sub>).

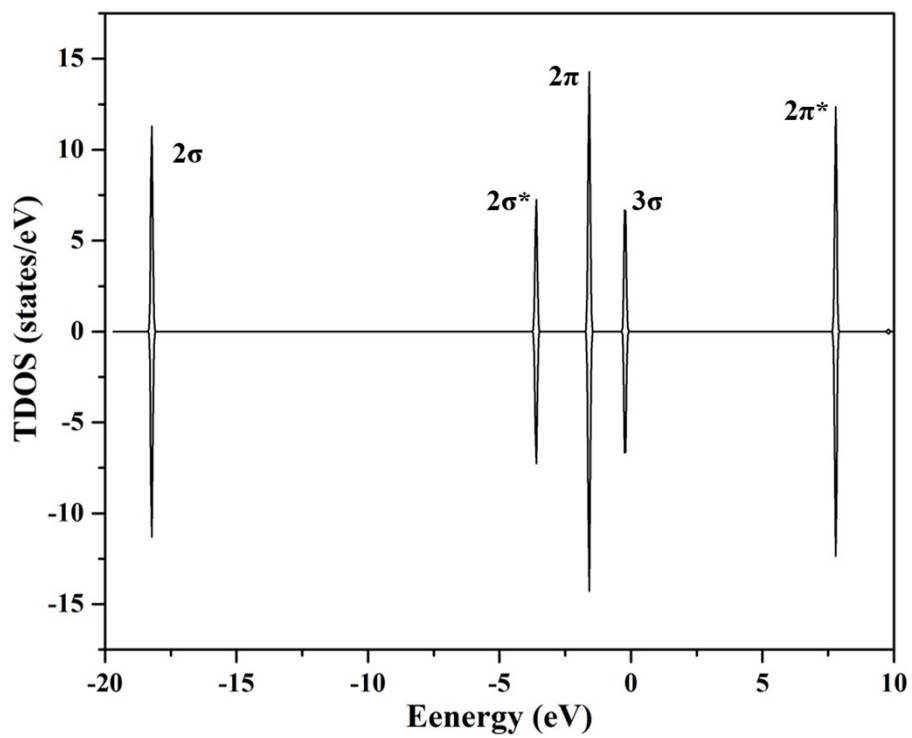

Fig. S8 Total density of states for free N<sub>2</sub> molecule.

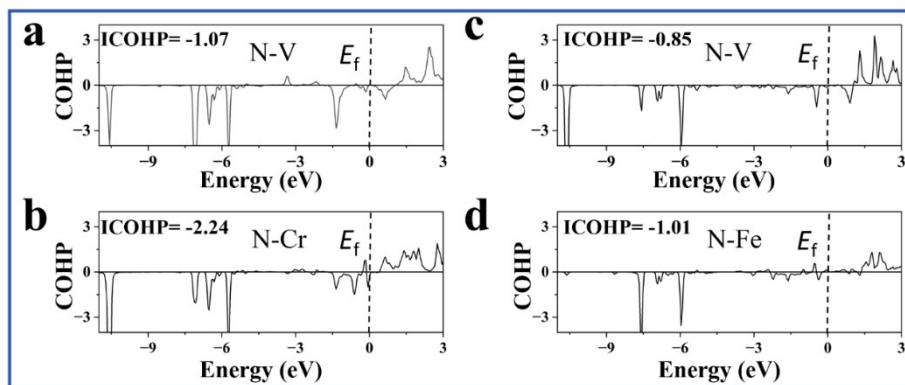

**Fig. S9** COHP for the interactions between N of adsorbed  $N_2$  and its bonded V and Cr atoms for  $N_2$  adsorbed V-Cr@GDY (a-b), and V and Fe for  $N_2$  adsorbed V-Fe@GDY (c-d).

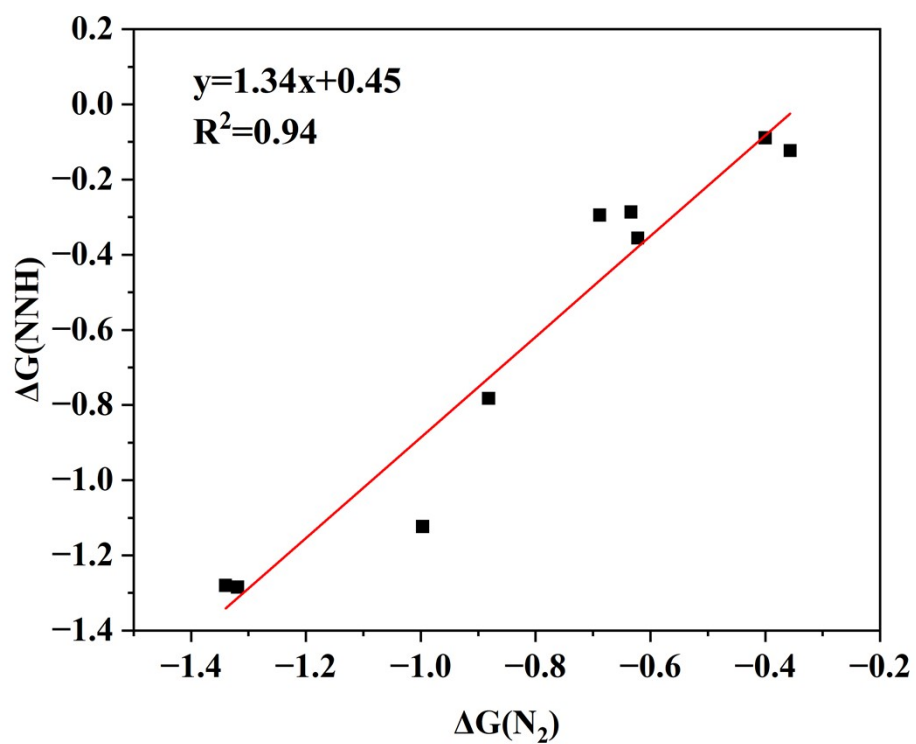

**Fig. S10** The NNH adsorption free energy ( $\Delta G(\text{NNH})$ ) versus the corresponding  $\text{N}_2$  adsorption free energy ( $\Delta G(\text{N}_2)$ ).

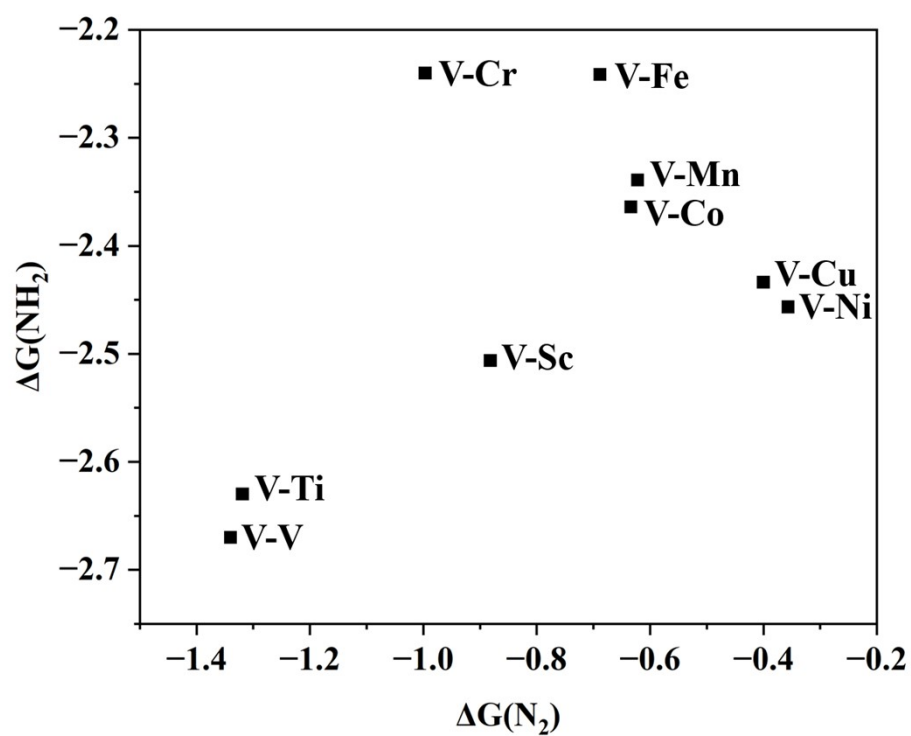

**Fig. S11** The  $\text{NH}_3$  adsorption free energy ( $\Delta G(\text{NH}_3)$ ) versus the corresponding  $\text{N}_2$  adsorption free energy ( $\Delta G(\text{N}_2)$ ).

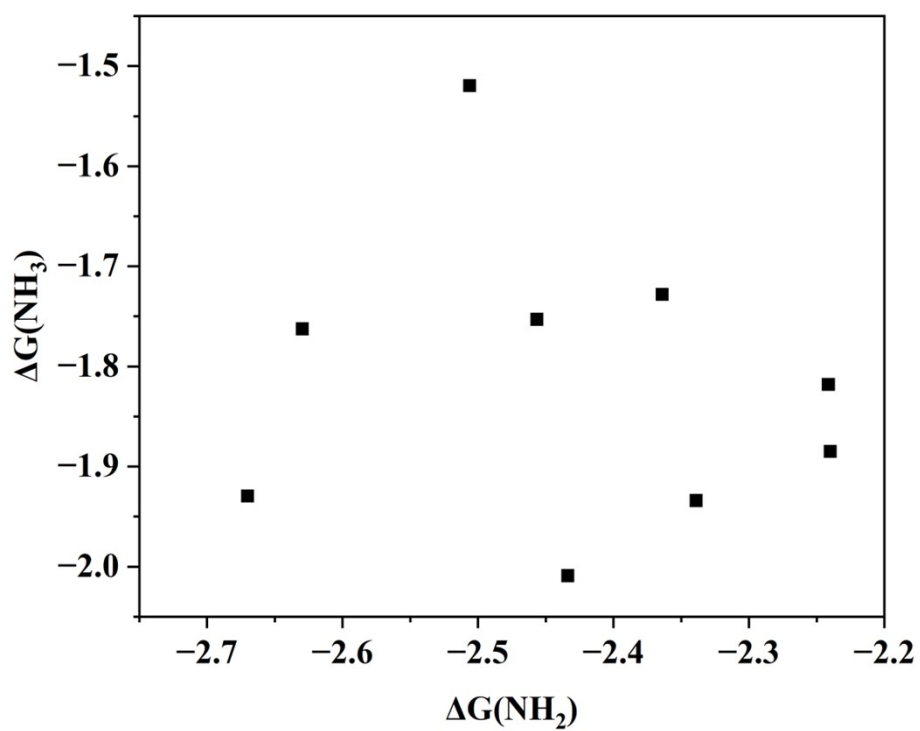

**Fig. S12** The  $\text{NH}_3$  adsorption free energy ( $\Delta G(\text{NH}_3)$ ) versus the corresponding  $\text{NH}_2$  adsorption free energy ( $\Delta G(\text{NH}_2)$ ).



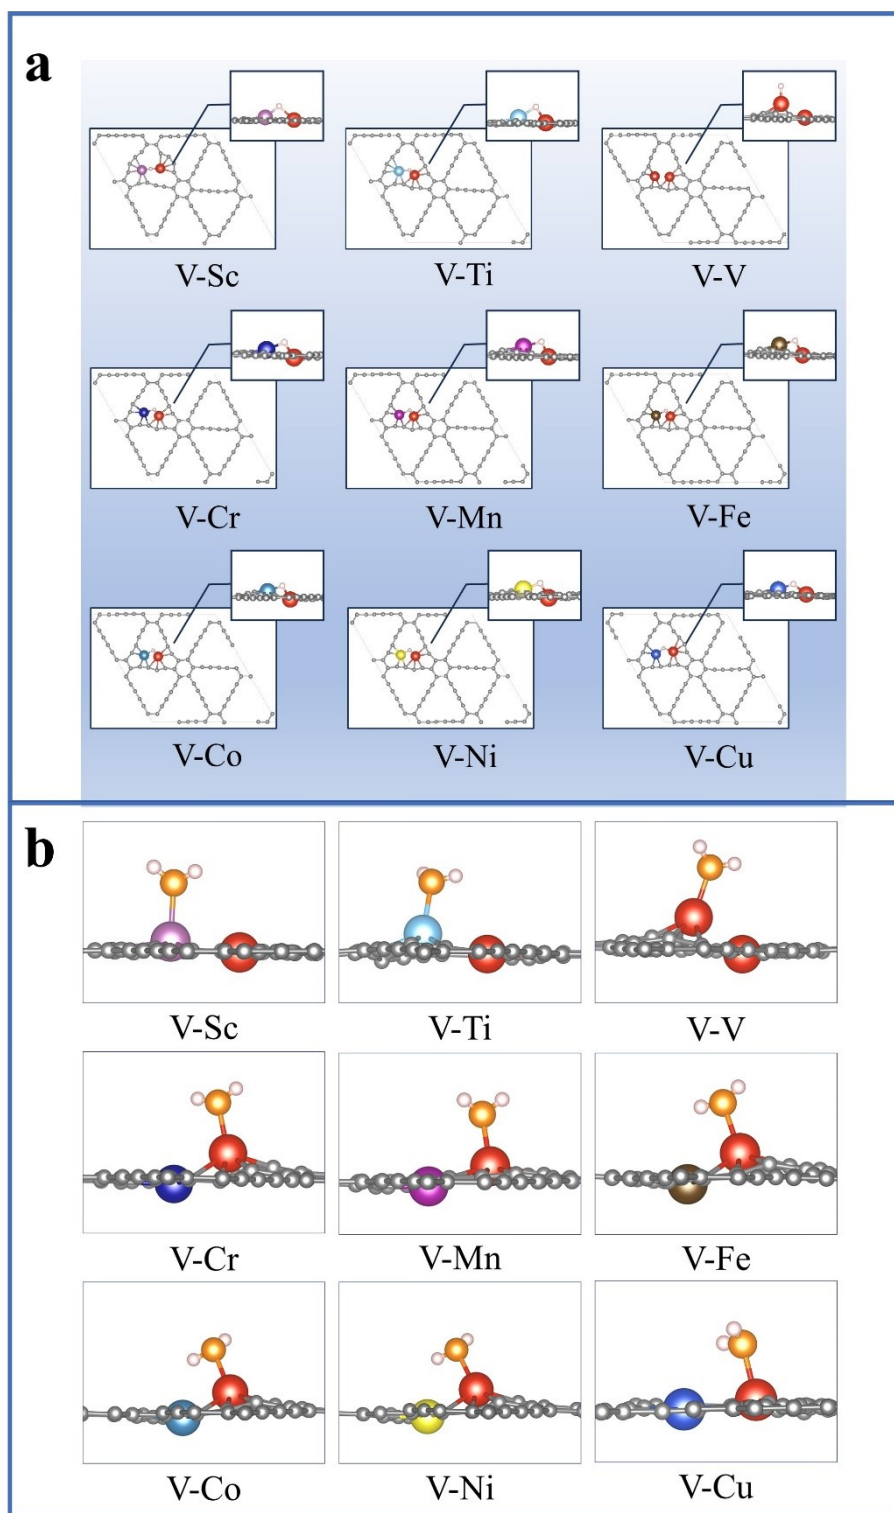

**Fig. S13** Optimized H (a) and H<sub>2</sub>O (b) adsorption configurations on V-TM@GDY (TM = Sc to Cu).

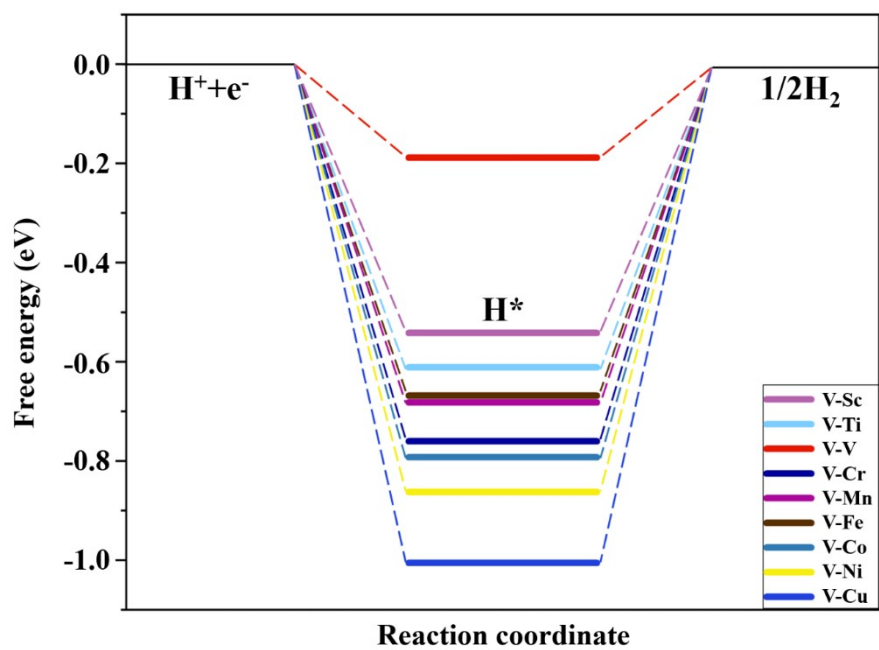

**Fig. S14** Free energy diagram of HER for V-TM@GDY.

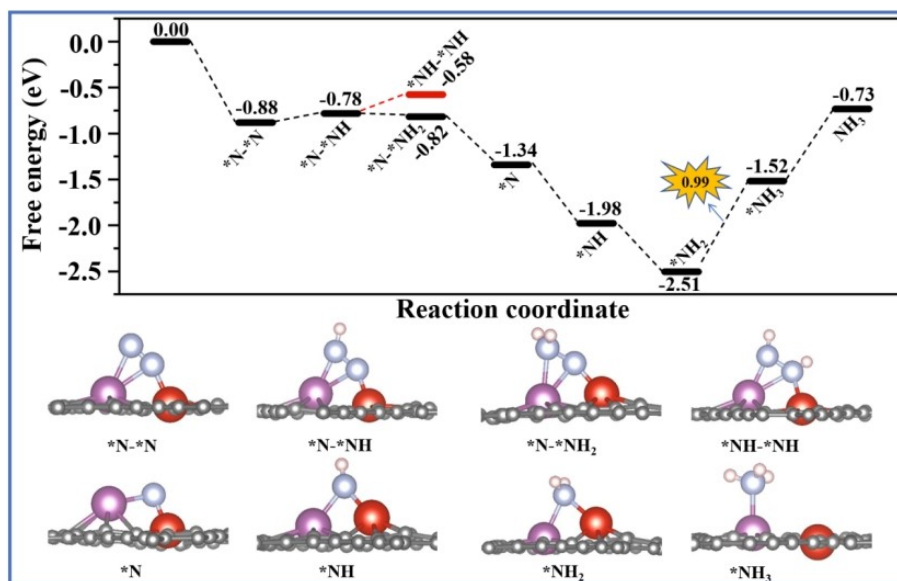

**Fig. S15** Free energy diagrams and corresponding reaction intermediates for NRR via a consecutive pathway on V-Sc@GDY.

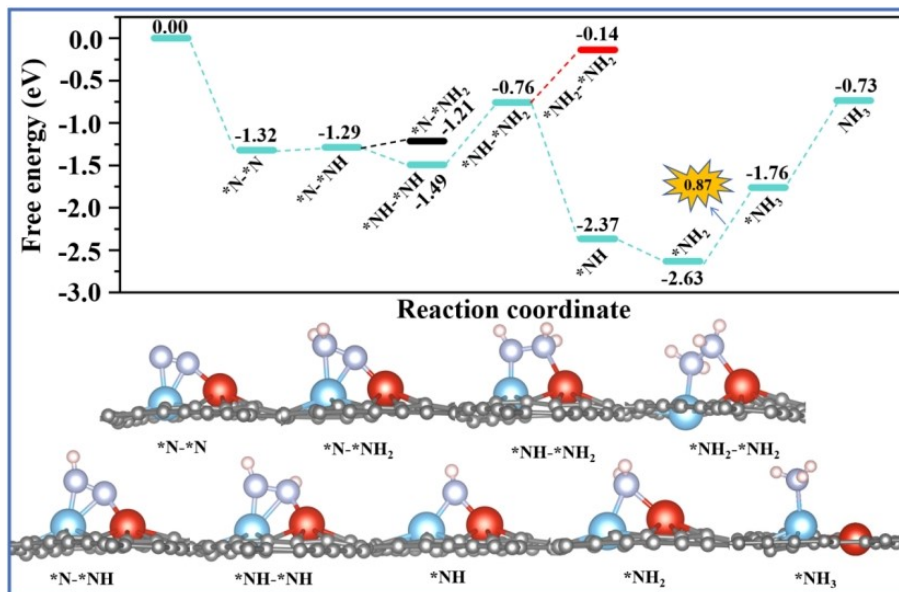

**Fig. S16** Free energy diagrams and corresponding reaction intermediates for NRR via a mixed pathway on V-Ti@GDY.

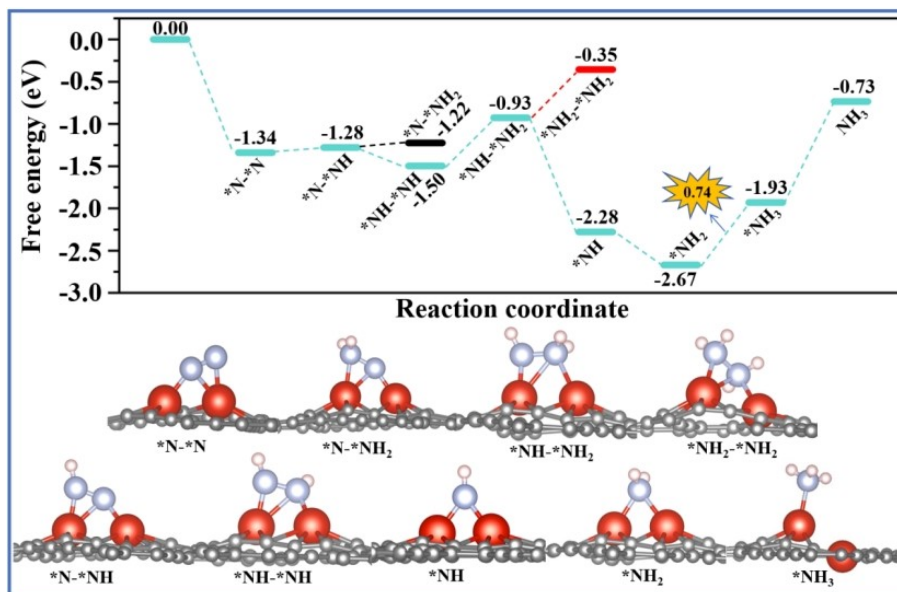

**Fig. S17** Free energy diagrams and corresponding reaction intermediates for NRR via a mixed pathway on V-V@GDY.

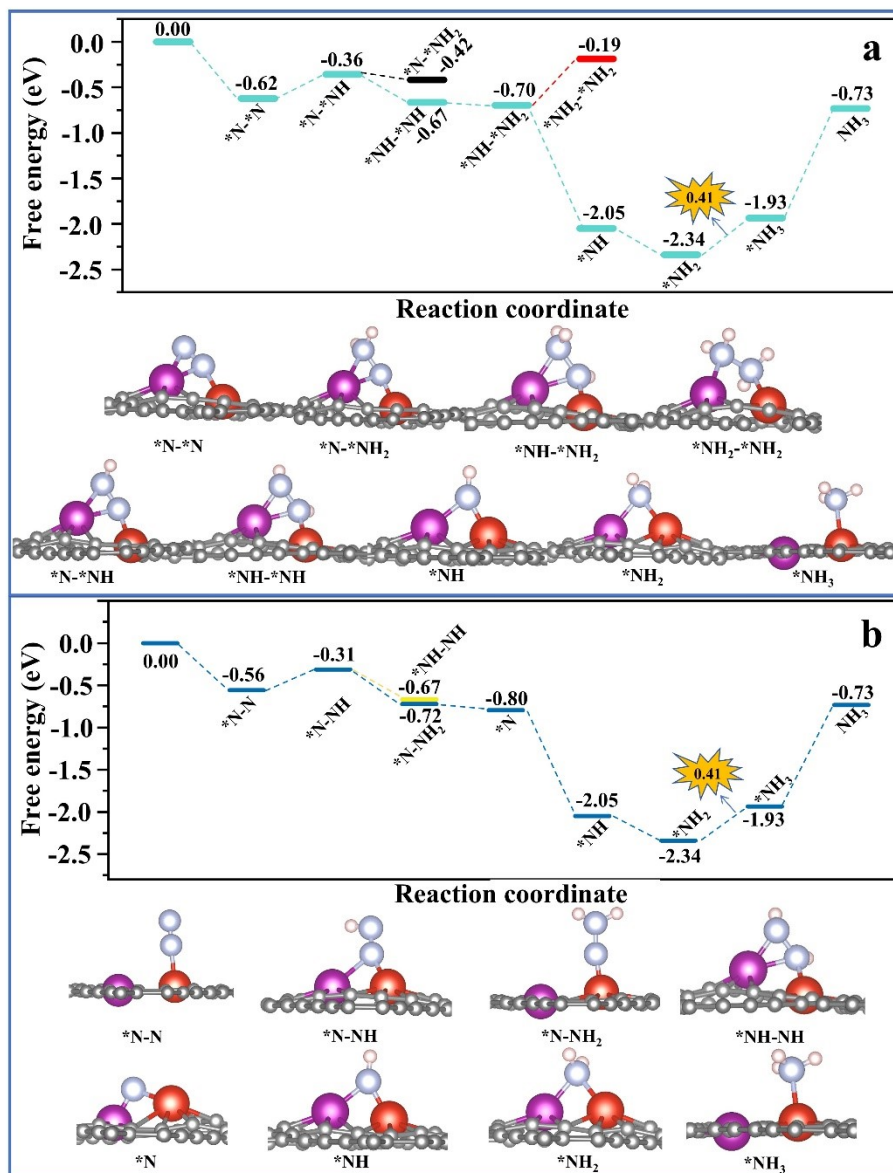

**Fig. S18** Free energy diagrams and corresponding reaction intermediates for NRR via a mixed pathway on V-Mn@GDY(a) and distal pathway (b).

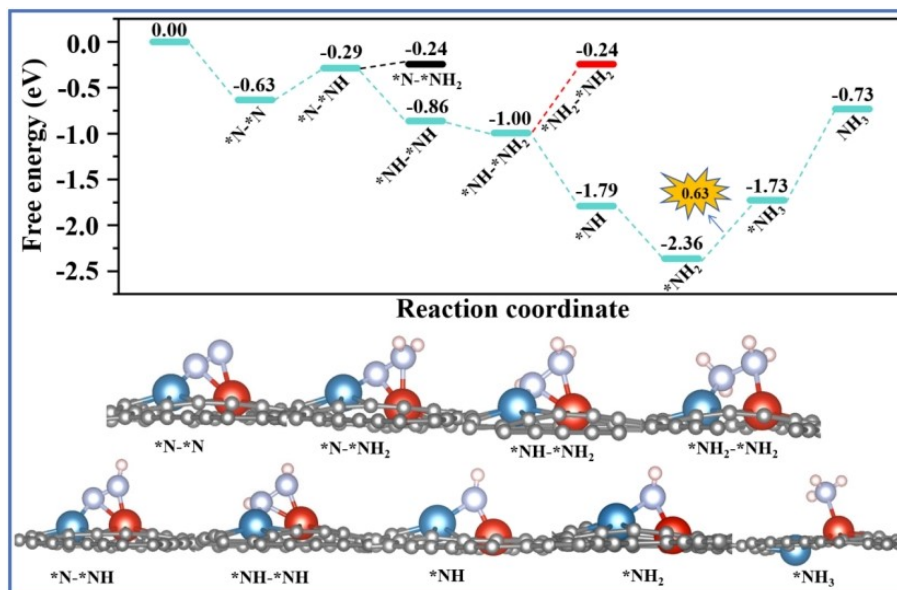

**Fig. S19** Free energy diagrams and corresponding reaction intermediates for NRR via a mixed pathway on V-Co@GDY.

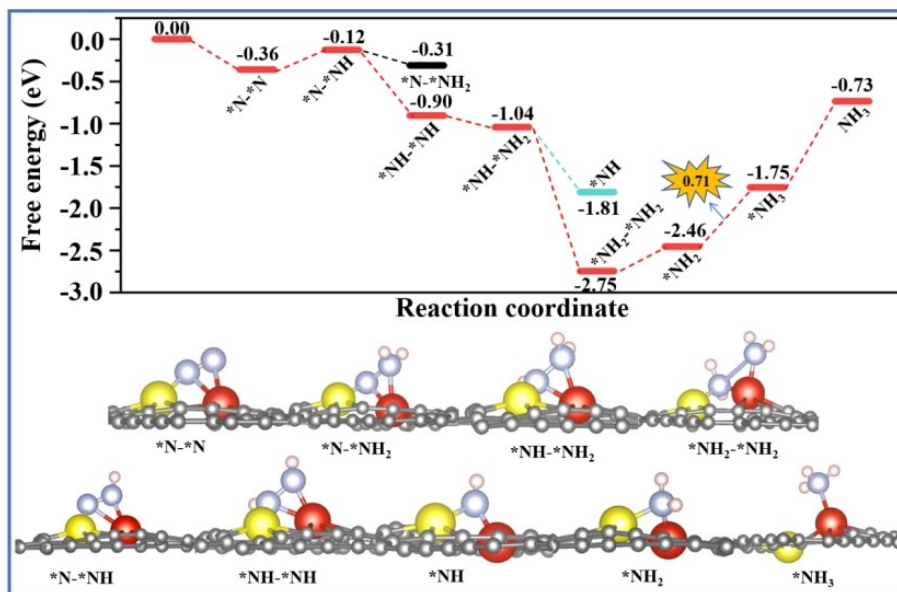

**Fig. S20** Free energy diagrams and corresponding reaction intermediates for NRR via an enzymatic pathway on V-Ni@GDY.



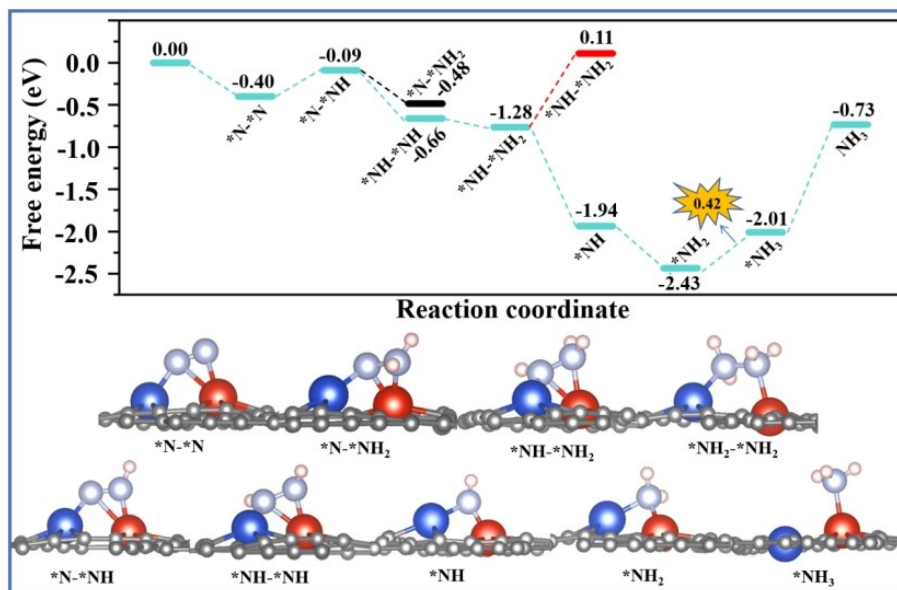

**Fig. S21** Free energy diagrams and corresponding reaction intermediates for NRR via a mixed pathway on V-Cu@GDY.

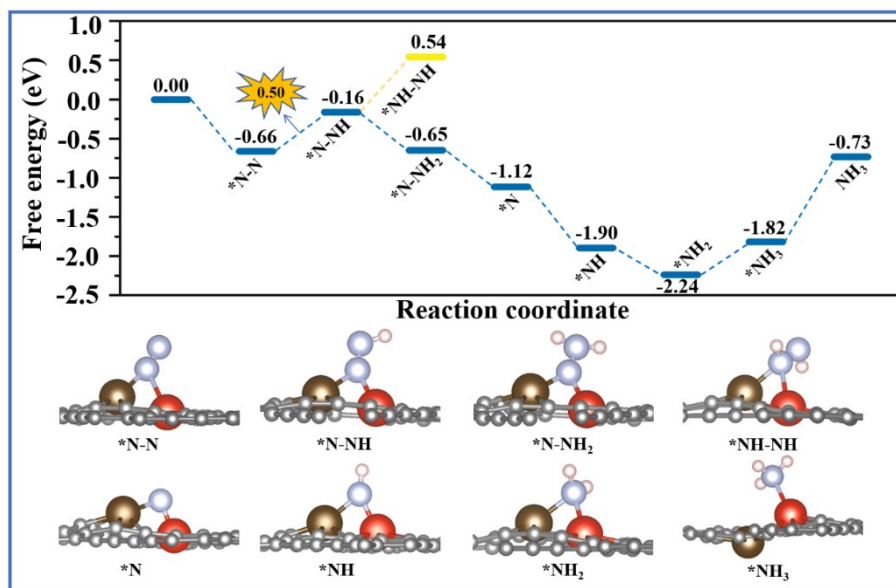

**Fig. S22** Free energy diagrams and corresponding reaction intermediates for NRR via a distal pathway on V-Fe@GDY.

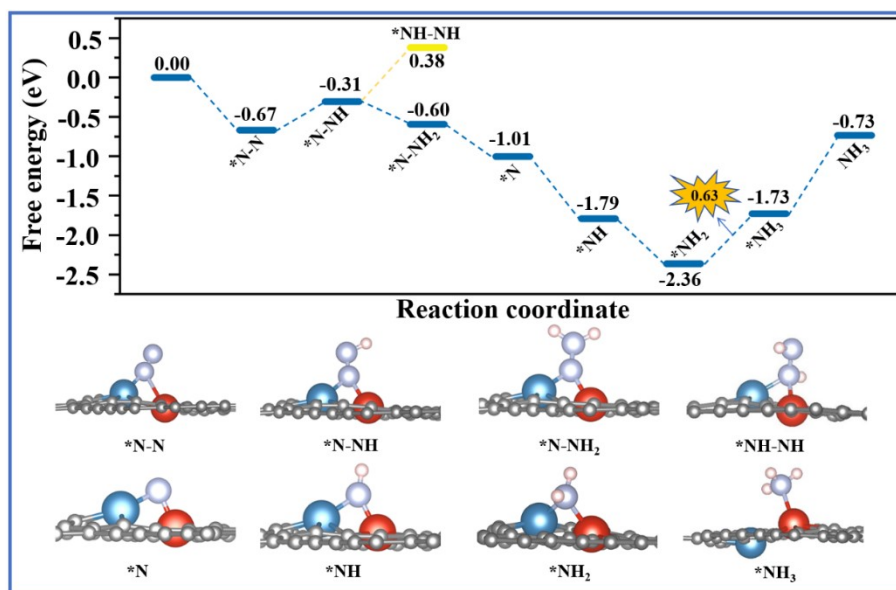

**Fig. S23** Free energy diagrams and corresponding reaction intermediates for NRR via a distal pathway on V-Co@GDY.

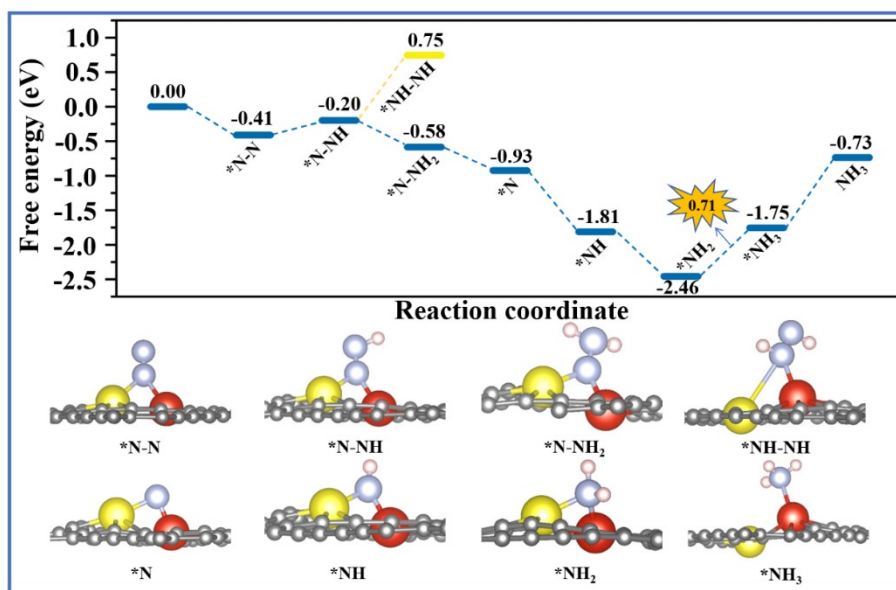

**Fig. S24** Free energy diagrams and corresponding reaction intermediates for NRR via a distal pathway on V-Ni@GDY.

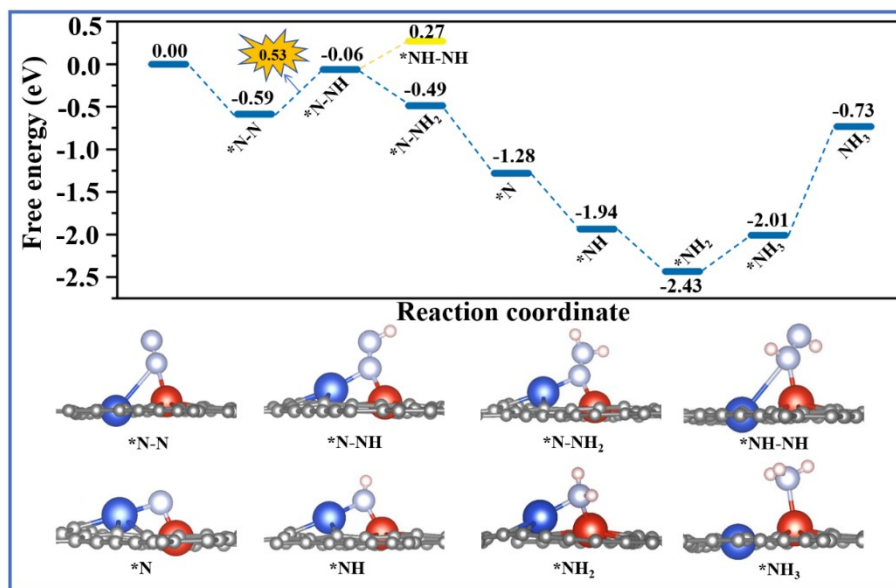

**Fig. S25** Free energy diagrams and corresponding reaction intermediates for NRR via a distal pathway on V-Cu@GDY.

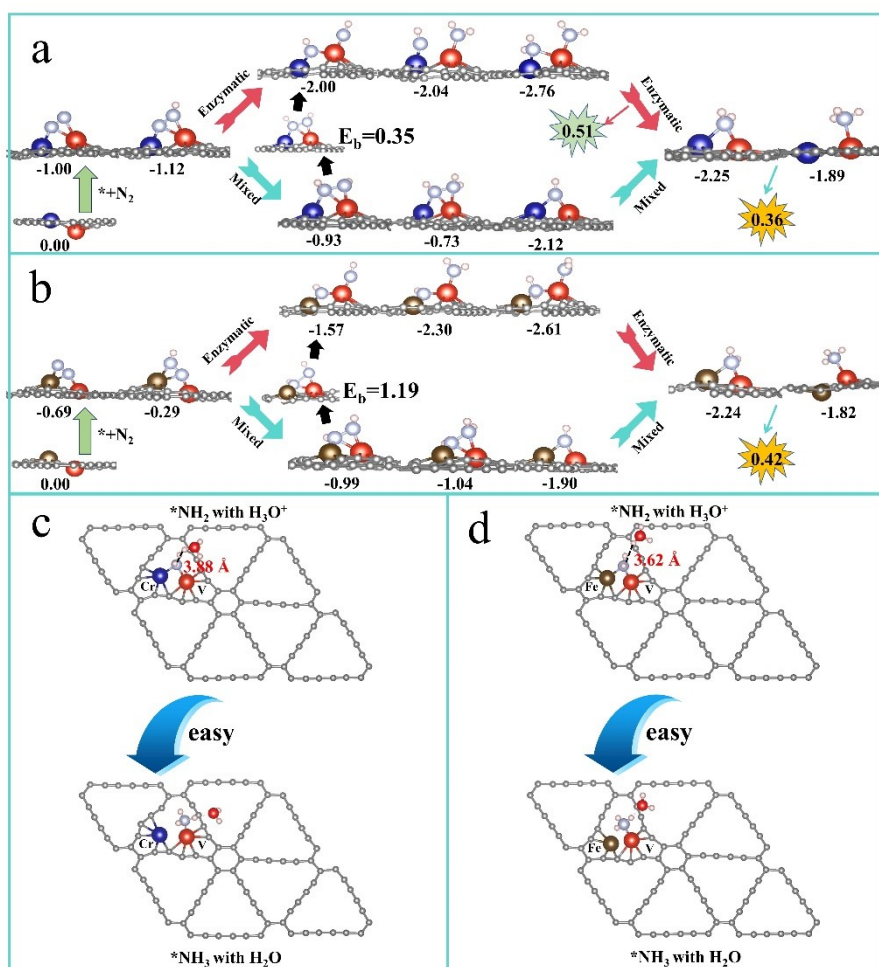

**Fig. S26** The intermediates and the free energy changes (in eV) for the NRR on V-Cr@GDY (a) and V-Fe@GDY (b). Easy protonation of  $*\text{NH}_2$  to  $*\text{NH}_3$  by  $\text{H}_3\text{O}^+$  under acidic conditions for V-Cr@GDY (c) and V-Fe@GDY (d).  $E_b$  denotes the energy barrier (in eV) for the dissociation of the adsorbed species.

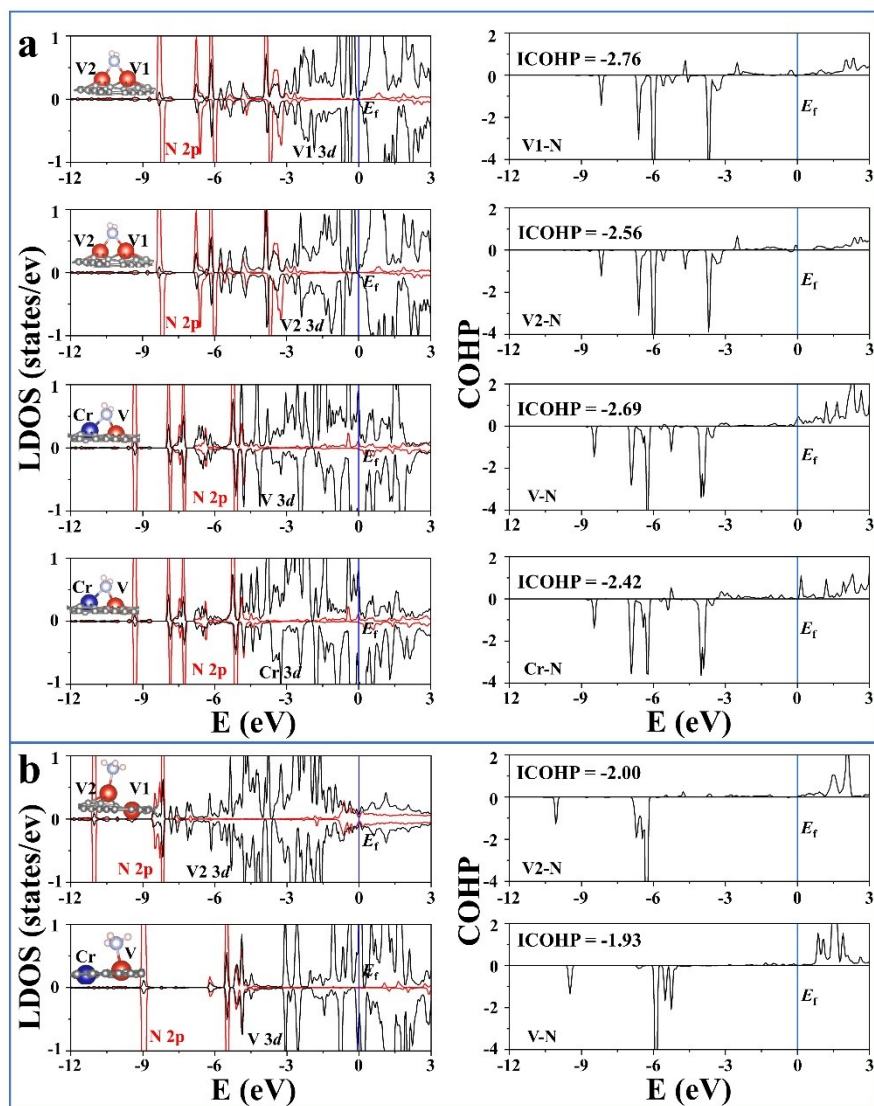

**Fig. S27** The LDOS projected on the N atom of the adsorbed  $\text{NH}_2$  species and its bonded TM atoms, and the relevant pCOHP and ICOHP (a), and The LDOS projected on the N atom of the adsorbed  $\text{NH}_3$  species and its bonded TM atoms, and the relevant pCOHP and ICOHP (b).

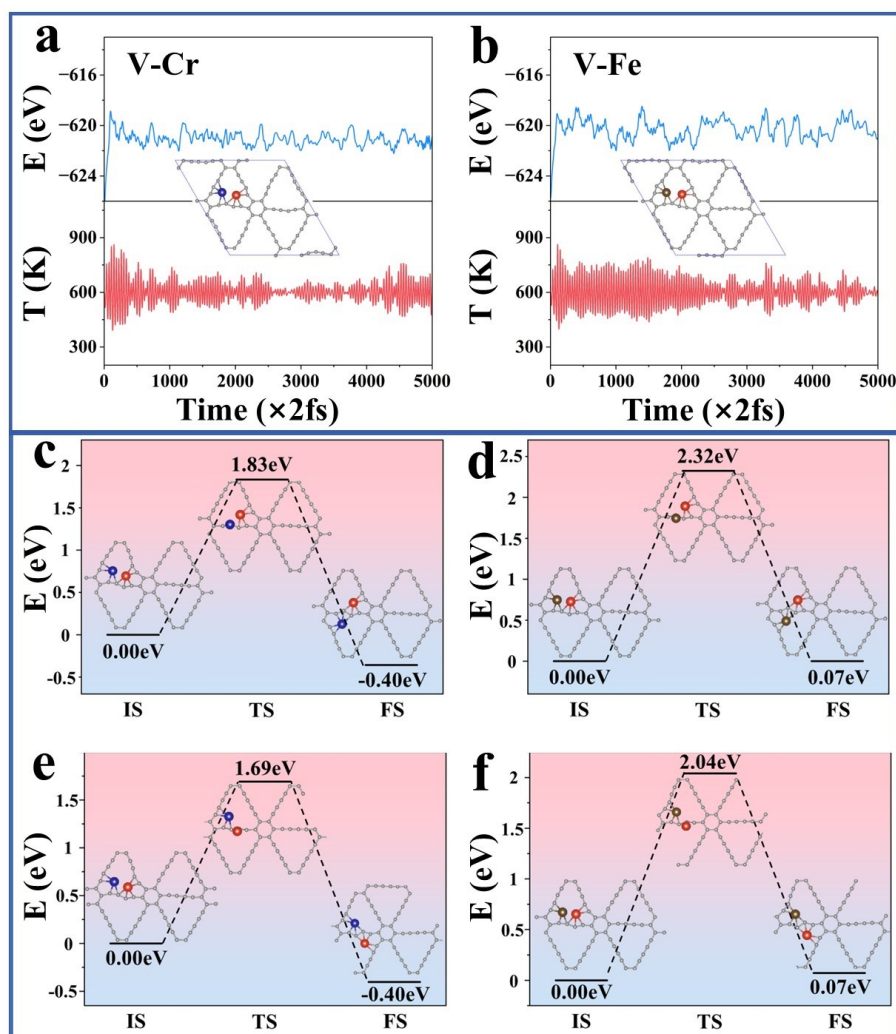

**Fig. S28** Energy and temperature fluctuations against the time in AIMD simulations over 10 ps at 600 K for V-Cr@GDY (a), V-Fe@GDY (b). Optimized structures of the initial state (IS), transition state (TS), final state (FS), and the energy barrier for the dissociation of the V-Cr pair in V-Cr@GDY (b-c) and the V-Fe pair in V-Fe@GDY (d-e), leading to the formation of separated single atoms.

## Reference

1. X. Guo; J. Gu; S. Lin; S. Zhang; Z. Chen; S. Huang, Tackling the Activity and Selectivity Challenges of Electrocatalysts toward the Nitrogen Reduction Reaction Via Atomically Dispersed Biatom Catalysts, *J. Am. Chem. Soc.*, 2020, **142**, 5709-5721.
2. W. Zhao; L. Zhang; Q. Luo; Z. Hu; W. Zhang; S. Smith; J. Yang, Single



Mo1(Cr1) Atom on Nitrogen-Doped Graphene Enables Highly Selective Electroreduction of Nitrogen into Ammonia, *ACS Catal.*, 2019, **9**, 3419-3425.

3. X. Liu; Y. Jiao; Y. Zheng; M. Jaroniec; S.-Z. Qiao, Building up a Picture of the Electrocatalytic Nitrogen Reduction Activity of Transition Metal Single-Atom Catalysts, *J. Am. Chem. Soc.*, 2019, **141**, 9664-9672.

4. X. Wang; Q. Zhang; W. Hao; C. Fang; J. Zhou; J. Xu, A Novel Porous Graphitic Carbon Nitride (G-C7n3) Substrate: Prediction of Metal-Based  $\Pi$ -D Conjugated Nanosheets toward the Highly Active and Selective Electrocatalytic Nitrogen Reduction Reaction, *J. Mater. Chem. A.*, 2022, **10**, 15036-15050.

5. [Http://Webbook.Nist.Gov/Chemistry/](http://Webbook.Nist.Gov/Chemistry/).

6. Z. Feng; Y. Tang; W. Chen; Y. Li; R. Li; Y. Ma; X. Dai, Graphdiyne Coordinated Transition Metals as Single-Atom Catalysts for Nitrogen Fixation, *Phys. Chem. Chem. Phys.*, 2020, **22**, 9216-9224.
